# Supplementary material for: Miltiradiene Production by Cytoplasmic Metabolic Engineering in Nicotiana benthamiana
Source: MDPI journal article supplement (doi:10.3390/metabo13121188), 2023-12-06
Supplement: s1 [file s1]

**Table S1** Primers sequence for plasmid construction.

| Primers                 | Sequences (5' to 3')                              |
|-------------------------|---------------------------------------------------|
| <i>SmGGPPS-F</i>        | TTCTGCCCCAAATTCGCGACCGGTATGAGATCTATGAATCTGGTGGATG |
| <i>SmGGPPS-R</i>        | GAGTTAAAGGCCTCGAGTCAGTTCTGCCTATGTGCAATGTAATCG     |
| <i>SmtGGPPS-F</i>       | TTCTGCCCCAAATTCGCGACCGGTATGGCCGTGCTCACCGGCGAGGAGG |
| <i>Sm(t)GGPPS-GFP-R</i> | TCTACCATGCTTCCGCTTCCGTTCTGCCTATGTGCAATGTAATCG     |
| <i>SmCPS-F</i>          | TTCTGCCCCAAATTCGCGACCGGTATGGCCTCCTTATCCTCTACAATCC |
| <i>SmCPS-R</i>          | GAGTTAAAGGCCTCGAGTCACGCGACTGGCTCGAAAAGCACT        |
| <i>SmtCPS-F</i>         | TTCTGCCCCAAATTCGCGACCGGTATGCAAGGCCATGATGCGGTGAAGA |
| <i>Sm(t)CPS-GFP-R</i>   | TCTACCATGCTTCCGCTTCCC GCGACTGGCTCGAAAAGCACT       |
| <i>SmKSL-F</i>          | TTCTGCCCCAAATTCGCGACCGGTATGTCGCTCGCCTTCAACCCGGCAG |
| <i>SmKSL-R</i>          | GAGTTAAAGGCCTCGAGTCATTTCCTCTCACATTATTAGCT         |
| <i>SmtKSL-F</i>         | TTCTGCCCCAAATTCGCGACCGGTATGAACCTTACTACAACAGATTTGA |
| <i>Sm(t)KSL-GFP-R</i>   | TCTACCATGCTTCCGCTTCCCTTTCCCTCTCACATTATTAGCT       |
| <i>GFP-F</i>            | GGAAGCGGAAGCATGGTAGATCTGACTAGTAAAGGAG             |
| <i>GFP-R</i>            | GAGTTAAAGGCCTCGAGTCAGCTAGCTTTGTATAGTTCATCCATG     |
| <i>SmHMGR-F</i>         | TTCTGCCCCAAATTCGCGACCGGTATGGATATCCGCCGAGGCCAGCCC  |
| <i>SmHMGR-R</i>         | GAGTTAAAGGCCTCGAGTCAGGAGCCAATCTTCGTGATGTCCCTG     |

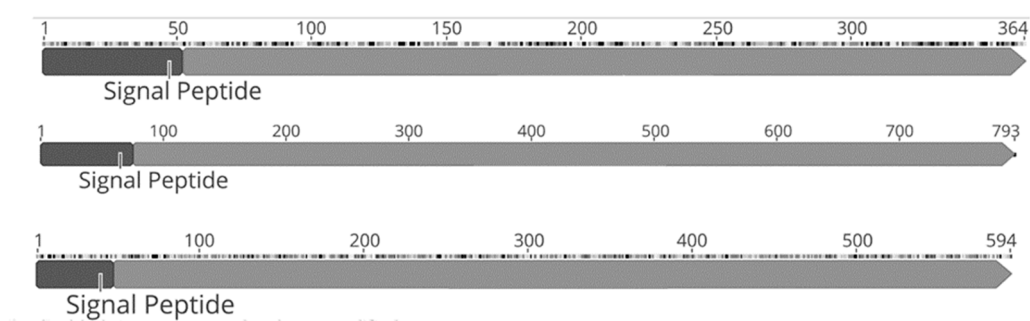

**Figure S1** The signal peptides of SmGGPPS, SmCPS and SmKSL.
